# Relationship between Thermodynamic Driving Force and One-Way Fluxes in Reversible Processes

Daniel A. Beard<sup>1\*</sup>, Hong Qian<sup>2</sup>

<sup>1</sup> Department of Physiology, Medical College of Wisconsin, Milwaukee, Wisconsin, United States of America, <sup>2</sup> Department of Applied Mathematics, University of Washington, Seattle, Washington, United States of America

Chemical reaction systems operating in nonequilibrium open-system states arise in a great number of contexts, including the study of living organisms, in which chemical reactions, in general, are far from equilibrium. Here we introduce a theorem that relates forward and reverse fluxes and free energy for any chemical process operating in a steady state. This relationship, which is a generalization of equilibrium conditions to the case of a chemical process occurring in a nonequilibrium steady state in dilute solution, provides a novel equivalent definition for chemical reaction free energy. In addition, it is shown that previously unrelated theories introduced by Ussing and Hodgkin and Huxley for transport of ions across membranes, Hill for catalytic cycle fluxes, and Crooks for entropy production in microscopically reversible systems, are united in a common framework based on this relationship.

Citation: Beard DA, Qian H (2007) Relationship between Thermodynamic Driving Force and One-Way Fluxes in Reversible Processes. PLoS ONE 2(1): e144. doi:10.1371/journal.pone.0000144

## INTRODUCTION

For a reaction occurring in an isothermal and isobaric system the chemical driving force  $\Delta G$ —the Gibbs free energy difference—characterizes how far a chemical reaction is away from equilibrium. If we take a simple bimolecular reaction in a dilute solution

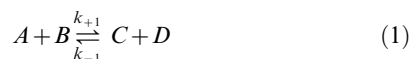

as an example, then  $\Delta G$  is related to the concentrations of the reactants and products, as well as the equilibrium constant  $K_{eq}$ , through the well-known thermodynamic equation

$$\Delta G = -RT \ln([A][B]K_{eq}/[C][D]). \quad (2)$$

If we further assume that the law of mass action governs the reaction's kinetics, then the forward and reverse reaction fluxes and equilibrium constant are

$$J^+ = k_{+1}[A][B], \quad J^- = k_{-1}[C][D], \quad K_{eq} = k_{+1}/k_{-1}, \quad (3)$$

where  $k_{+1}$  and  $k_{-1}$  are constants that do not depend on the concentrations. Combining Equations (2) and (3) yields

$$\Delta G = -RT \ln(J^+/J^-). \quad (4)$$

Expressing  $\Delta G$  in terms of Equation (4) has many advantages: It is apparent that if  $\Delta G = 0$ , then  $J^+ = J^-$ . This equilibrium relationship is required by the principle of detailed balance, which states that at equilibrium the forward and reverse fluxes are equal for all existing independent mechanisms for the reaction  $A \rightleftharpoons B$  [1]. Furthermore, Equation (4) can be generalized to many other situations. For example, for reversible enzyme reactions governed by Michaelis-Menten kinetics, although both  $J^+$  and  $J^-$  are complex, nonlinear functions of reactant and substrate concentrations, Equation (4) still holds true.

Another nontrivial example of Equation (4) that arises in cycle kinetics in unimolecular systems is due to T.L. Hill [2–5]. As in the example above, the law of mass action is assumed in all of Hill's work. The novelty of this note is to show a wide range of validity of

Equation (4) based solely on conservation of mass, without invoking any assumptions of rate laws such as Equation (3). Hence, Equation (4) is in fact a fundamental relation for any chemical process operating in an open-system steady state.

The relation is also intimately related to the fluctuation theorem [6,7,8,9]. However, the most significant insight from the present work is that the relation between one-way-fluxes and  $\Delta G$  can be established without any supposition on the dynamics of a system.

## ANALYSIS

### Flux and Free Energy in a Nonequilibrium Open System

For the reaction  $A \rightleftharpoons B$ , the Gibbs free energy change per mole of molecules that transform from state A to state B is expressed

$$\Delta G = \Delta G^0 + RT \ln(N_B/N_A), \quad (5)$$

where  $N_A$  and  $N_B$  are the number of molecules in states A and B, respectively. In equilibrium, the ratio  $N_B/N_A$  is equal to  $e^{-\Delta G^0/RT} = K_{eq}$  and the net reaction flux is  $J = J^+ - J^- = 0$ , where  $J^+$  and  $J^-$  are the forward and reverse reaction fluxes, respectively. When  $\Delta G < 0$ , the net flux  $J$  from A to B is positive.

To determine how flux and free energy are related for systems not in equilibrium we consider, without loss of generality, the case where  $N_B/N_A < K_{eq}$  and  $J > 0$ . In a nonequilibrium steady state  $N_A$  and  $N_B$

**Academic Editor:** Timothy Secomb, University of Arizona, United States of America

**Received:** October 9, 2006; **Accepted:** December 12, 2006; **Published:** January 3, 2007

**Copyright:** © 2007 Beard, Qian. This is an open-access article distributed under the terms of the Creative Commons Attribution License, which permits unrestricted use, distribution, and reproduction in any medium, provided the original author and source are credited.

**Funding:** This work was supported by NIH grant GM0680610.

**Competing Interests:** The authors have declared that no competing interests exist.

\* To whom correspondence should be addressed. E-mail: dbeard@mcw.edu

are held constant by pumping A molecules into the system, and pumping B molecules out of the system, at the steady-state flux  $\mathcal{J}$ .

Next imagine that we are able to place a label on each molecule that converts from state B to state A. These particles we denote by A\*. Apart from the label, A\* molecules are identical in every way to unlabeled A molecules in this thought experiment. In addition, imagine that A\* molecules lose their label when they convert to B molecules. Thus if we continue to pump A and B molecules into and out of the system at the constant flux  $\mathcal{J}$ , then a steady state will be reached for which  $N_{A^*}$ , the number of labeled molecules in state A\*, is less than or equal to  $N_A$ , the total number of labeled plus unlabeled molecules in state A.

The steady state is reached when the rate of conversion of labeled A\* molecules into state B is equal to the rate of conversion from B to A\*. Since there is no transport of A\* into or out of the system, then in the steady state the  $N_{A^*}$  molecules in state A\* will be in equilibrium with the  $N_B$  molecules in state B:  $N_B/N_{A^*} = K_{eq}$ . Mass conservation requires that the forward flux of A\* $\rightarrow$ B equal the reverse flux of B $\rightarrow$ A\*, or  $J^+ \frac{N_{A^*}}{N_A} = J^-$ . Combining these equations, we have:

$$\frac{J^+}{J^-} = \frac{N_A}{N_B} K_{eq}. \quad (6)$$

This relationships hold for a reaction operating in any steady state, including thermodynamic equilibrium. In equilibrium,  $J^+ = J^-$ , and

$$\frac{N_A}{N_B} K_{eq} = 1. \quad (7)$$

Thus it is trivial that Equation (6) holds in equilibrium. The more interesting case is a nonequilibrium steady state for which Equations (5) and (6) yield Equation (4). Therefore Equation (4) is a condition that does not depend on the details of the kinetic reaction mechanism that is operating in a particular system. In addition, the above proof is easily generalized to apply to multimolecular (non-uni-unimolecular) chemical reactions or any spontaneous process transforming or transporting mass from one state to another. Therefore Equation (4) represents a fundamental property of any chemical process in dilute solution.

## Relationship to other Theories

**Hill Equation for Catalytic Cycles** For the case of a catalytic cycle with  $J^+/J^-$  equal to the ratio of the forward-to-reverse cycle flux and  $\Delta G$  equal to the thermodynamic driving force for the cycle, Equation (4) is identical to the relationship introduced by Hill [2,5,10] and proved by Kohler and Vollmerhaus [11] and by Qian et al. [12] for cycles in Markov systems. (See Equations (3.7) and (7.8) in [5].) Therefore the relationship between  $J^+/J^-$  and  $\Delta G$  introduced by Hill for linear cycle kinetics is a special case of Equation (4).

As specific example, consider the well known Michaelis-Menten enzyme mechanism:

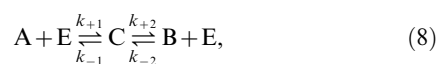

in which E is an enzyme involved in converting substrate A into product B. The steady-state flux through this mechanism is

$$J_{MM}(a,b) = J^+ - J^- = \frac{k_f a - k_r b}{1 + a/K_a + b/K_b}, \quad (9)$$

where  $E_o$  is the total enzyme concentration,  $a = [A]$ ,  $b = [B]$ ,  $k_f = E_o k_{+1} k_{+2} / (k_{-1} + k_{+2})$ ,  $k_r = E_o k_{-1} k_{-2} / (k_{-1} + k_{+2})$ ,  $K_a = (k_{-1} + k_{+2}) / k_{+1}$ , and  $K_b = (k_{-1} + k_{+2}) / k_{-2}$ . Identifying  $J^+$  as the positive term and  $J^-$  as the negative term in Equation (9), it is straightforward to verify that  $J^+$  and  $J^-$  satisfy Equation (4), where  $\Delta G^o = -RT \ln (k_{+1} k_{+2} / k_{-1} k_{-2})$ . In application in biochemical enzyme kinetics, it is sometimes assumed that  $k_{-2}[B] = 0$ , resulting in the well known Michaelis-Menten equation for an irreversible reaction (see below).

**Crooks Fluctuation Theorem** Again, we consider a system made up of molecules that can transition between two states:  $A \rightleftharpoons B$ . The system is sustained in a steady-state with constant numbers of A and B; therefore, each transition brings the system back to its starting state in a cyclic fashion. If  $\Gamma^+$  is the mean forward transition rate (number of transitions per unit time) for which the system is driven in the forward direction, then the probability of  $n$  forward transitions in a finite time period  $\tau$  is given by the Poisson distribution:  $P_+(n) = (\tau \Gamma^+)^n e^{-\tau \Gamma^+} / n!$ . Likewise, the probability of  $m$  reverse transitions is  $P_-(m) = (\tau \Gamma^-)^m e^{-\tau \Gamma^-} / m!$ , where  $\Gamma^-$  is the reverse transition rate. Hence, the probability of net forward turnover  $l = m - n$  is given by

$$P_F(l) = \sum_{n=l}^{\infty} P_+(n) \cdot P_-(n-l) = (\tau \Gamma^-)^{-l} \sum_{n=l}^{\infty} \frac{(\tau^2 \Gamma^+ \Gamma^-)^n e^{-\tau(\Gamma^+ + \Gamma^-)}}{n!(n-l)!} \quad (10)$$

and the probability of  $l$  net reverse turnovers is

$$P_R(l) = \sum_{m=l}^{\infty} P_+(m-l) \cdot P_-(m) = (\tau \Gamma^+)^{-l} \sum_{m=l}^{\infty} \frac{(\tau^2 \Gamma^+ \Gamma^-)^m e^{-\tau(\Gamma^+ + \Gamma^-)}}{(m-l)!m!} \quad (11)$$

Associated with net  $l$  forward turnover cycles is the isothermal heat dissipation which is equal to the entropy production (e.p.) of  $-(l\Delta G)$ ; the net  $l$  reverse turnovers have an e.p. of  $+(l\Delta G)$ . Therefore, the ratio of the probability of e.p. =  $\sigma$  to the probability of e.p. =  $-\sigma$ , within a finite time interval, is

$$\frac{\Pr(\text{e.p.} = +\sigma)}{\Pr(\text{e.p.} = -\sigma)} = \frac{P_F(l = +\sigma/\Delta G)}{P_R(l = -\sigma/\Delta G)} = \left( \frac{\Gamma^+}{\Gamma^-} \right)^{\frac{\sigma}{\Delta G}} \quad (12)$$

Since the chemical flux is proportional to the number of transitions per unit time,  $\Gamma^+/\Gamma^- = J^+/J^-$ . Connecting this result with Equation (4), we have

$$\frac{\Pr(\text{e.p.} = +\sigma)}{\Pr(\text{e.p.} = -\sigma)} = e^{\frac{\sigma}{RT}}, \quad (13)$$

which is known as the Crooks fluctuation theorem [6].

**Using Flux Ratio** When a charged species is transported across a biological membrane, the ionic flux is influenced by any electrostatic potential difference that exists across the membrane. Using the convention that the electrostatic potential across a cell is measured as the outside potential subtracted from inside potential, Equation (4) is expressed

$$\frac{J^{out}}{J^{in}} = \exp\left(\frac{-\Delta G}{RT}\right) = \frac{c_i}{c_o} \exp\left(\frac{zF\Delta\Psi}{RT}\right) \quad (14)$$

for passive transport of a single ion across a cell membrane. Here,

$c_i$  and  $c_o$  in Equation (14) denote the concentrations of the ion on the inside and outside of the cell, respectively;  $z$  is the valence number of the ion;  $F$  is Faraday's constant;  $\Delta\Psi$  is the electrostatic potential (defined as inside potential minus outside potential); and  $\mathcal{J}^{in}$  and  $\mathcal{J}^{out}$  are inward and outward one-way fluxes. The flux ratio in form of Equation (14) was introduced in 1949 by Ussing [13] for the case of passive transport of single ions and is known as the Ussing flux ratio. Based on the assumption that  $\mathcal{J}^{out}$  is independent of  $c_o$  and that  $\mathcal{J}^{in}$  is independent of  $c_i$ , Hodgkin and Huxley derived the same expression in 1952 [14].

The current work shows that the theory of Ussing and Hodgkin and Huxley is a special case of Equation (4). In addition to single-channel fluxes for which the Ussing flux ratio has been developed and applied, the flux ratio of Equation (4) applies to all active and passive transport processes as well as multiple-ion transporters.

### Additional Consequences

**Net Flux for Nearly Irreversible Reactions is Proportional to Reverse Flux** We can study nearly irreversible systems based on Equation (4). The net flux through a chemical process is  $\mathcal{J} = \mathcal{J}^+ - \mathcal{J}^-$ ; thus,  $e^{-\Delta G/RT} = \mathcal{J}^+/\mathcal{J}^- + 1$ , which leads to the approximation

$$J = J^- e^{-\Delta G/RT} \quad (15)$$

for nearly irreversible reactions ( $\mathcal{J} \gg \mathcal{J}^-$ ). Thus the net flux through an enzyme in a reaction operating far from equilibrium is proportional to the reverse flux.

For the quasi-steady approximation of Equation (9) the reverse flux is  $\mathcal{J}^- = k_r b / (1 + a/K_a + b/K_b)$ ; thus for a nearly irreversible reaction

$$J = J^- K_{eq} \frac{a}{b} = \frac{k_f a}{1 + a/K_a + b/K_b}, \quad (16)$$

which is the expression that we would arrive at by setting  $k_{-2} = 0$  in Equation (9). Note that the usual irreversible Michaelis-Menten equation derives from the assumption that  $k_{-2} = 0$ , which results in

$$J = \frac{k_f a}{1 + a/K_a}. \quad (17)$$

This analysis illustrates that the assumption  $k_{-2} = 0$  is a special case of the irreversible single-substrate enzyme. Equation (16) is the general approximation for the case of  $|\Delta G/RT| \gg 1$ , where  $k_{-2}$  may be finite.

**Net Flux for Highly Reversible Reactions is Proportional to Reverse Flux** Near equilibrium (for  $|\Delta G| \ll RT$ ) the flux can be approximated as linearly proportional to the thermodynamic driving force:  $\mathcal{J} = -X\Delta G$ , where  $X$  is the Onsager coefficient [15,16]. When the near-equilibrium approximation  $|\Delta G| \ll RT$  holds, the flux ratio  $\mathcal{J}^+/\mathcal{J}^-$  is approximately equal to 1. In this case Equation (4) is approximated

$$\Delta G = -RT(\mathcal{J}^+/\mathcal{J}^- - 1) = -\frac{RT}{\mathcal{J}^-}(\mathcal{J}^+ - \mathcal{J}^-). \quad (18)$$

From this expression, we have

$$J = -\frac{J^-}{RT} \Delta G. \quad (19)$$

Therefore for highly reversible systems, the net flux is proportional to the reverse flux times the thermodynamic driving force; the Onsager coefficient is equal to  $\mathcal{J}^-/RT$ .

**Application to Transport Processes** In addition to application to chemical reactions, Equation (4) is directly applied to transport processes. For example, one-dimensional transport of particles in a complex medium is governed by a Fokker-Planck equation with spatially dependent diffusion coefficient  $D(x)$  and potential function  $u(x)$  [17]:

$$\frac{\partial c(x,t)}{\partial t} = -\frac{\partial}{\partial x} \left[ \frac{D}{RT} c \frac{\partial u}{\partial x} + D \frac{\partial c}{\partial x} \right], \quad (20)$$

over the domain  $0 \leq x \leq 1$ . The steady-state transport flux predicted by this equation is [17]

$$J = J^+ - J^- = -\frac{D}{RT} c \frac{\partial u}{\partial x} - D \frac{\partial c}{\partial x} = \left( c_0 e^{u(0)/RT} - c_1 e^{u(1)/RT} \right) \left[ \int_0^1 \frac{e^{u(x)/RT}}{D(x)} dx \right]^{-1}, \quad (21)$$

where  $c_0$  and  $c_1$  are the concentrations of the two reservoirs at  $x=0$  and  $x=1$ . Recognizing that  $\Delta G = -\{u(1) - u(0) + RT \ln(c_1/c_0)\}$  for this system, we have Equation (4).

**Exchange of Isotope Labels** A variety of isotope labeling methods are used to determine in vivo metabolic fluxes. In some cases, it is possible to estimate not only the net flux of a given reaction, but also the forward and reverse rate at which an isotope label exchanges between species involved in a chemical reaction [18]. Consider as examples the enzyme-mediated catalysis schemes for the reaction  $A \rightleftharpoons B$  illustrated in Figure 1.

For the reversible Michaelis-Menten example of the left panel, which is described by Equations (8) and (9), the exchange flux ratio—the rate at which a label on A molecules is transferred to B molecules divided by the rate at which a label on B molecules is transferred to A molecules is given by Equation (4),

$$\left( \frac{J^+}{J^-} \right)_{exchange} = \exp\left( \frac{-\Delta G_{AB}}{RT} \right) = K_{eq} \frac{a}{b}, \quad (22)$$

where  $\Delta G_{AB}$  and  $K_{eq}$  are the Gibbs free energy and equilibrium constant for the reaction.

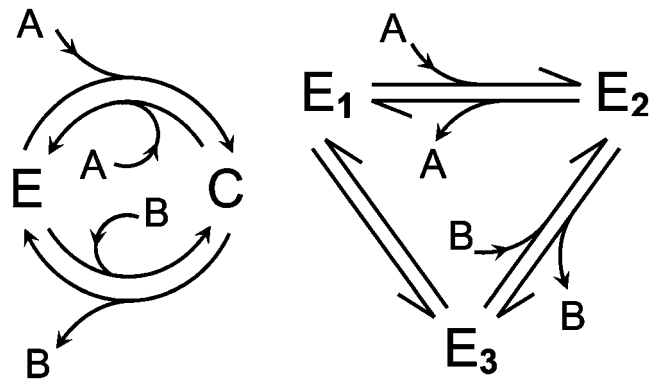

**Figure 1. Example enzyme mechanisms for the reaction  $A \rightleftharpoons B$ .** The left panel illustrates the Michaelis-Menten scheme of Equation (8), in which enzyme binds to substrate A, forming a complex C. The product B reversibly dissociates from the complex C, forming unbound enzyme E. The right panel illustrates a more complex mechanism involving three enzyme states  $E_1$ ,  $E_2$ , and  $E_3$ . Enzyme kinetic theory assumes that the state transitions follow mass-action kinetics, as described by Equation (8) for the left panel and Equation (23) for the right panel. doi:10.1371/journal.pone.0000144.g001

For the mechanism illustrated in the right panel of the figure, the exchange flux ratio takes a slightly different form. This enzyme mechanism has the following elementary steps:

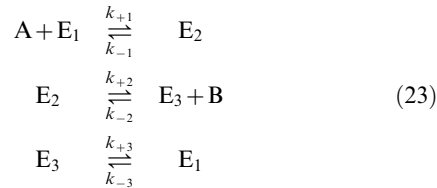

where  $K_{eq} = (k_{+1} \cdot k_{+2} \cdot k_{+3}) / (k_{-1} \cdot k_{-2} \cdot k_{-3})$ . The overall flux ratio for the enzyme cycle  $\text{E}_1 + \text{A} \rightleftharpoons \text{E}_1 + \text{B}$ , has the same form as Equation (22)

$$\left(\frac{J^+}{J^-}\right)_{cycle} = \exp\left(\frac{-\Delta G_{AB}}{RT}\right) = K_{eq} \cdot \frac{a}{b}. \quad (24)$$

The exchange flux ratio follows from applying Equation (4) or (6) to the reaction  $\text{E}_1 + \text{A} \rightleftharpoons \text{E}_3 + \text{B}$ :

$$\left(\frac{J^+}{J^-}\right)_{exchange} = K_{eq} \frac{a}{b} \cdot \frac{k_{-3}[\text{E}_1]}{k_{+3}[\text{E}_3]} \leq \frac{-\Delta G_{AB}}{RT} \quad (25)$$

where the apparent equilibrium constant for the reaction  $\text{E}_1 + \text{A} \rightleftharpoons \text{E}_3 + \text{B}$  is  $K = K_{eq} k_{-3} / k_{+3}$ . The inequality in Equation (25)

is for the case that the net flux is positive and therefore  $k_{-3}[\text{E}_1] \leq k_{+3}[\text{E}_3]$ .

## DISCUSSION

In summary, we have demonstrated that Equation (4) is a fundamental condition that is satisfied by any chemical process operating in a steady state in dilute solution. This equation is a generalization of the well known equilibrium conditions  $\Delta G = 0$  and  $\mathcal{J}^- = \mathcal{J}^+$  to the case of a chemical process occurring in a nonequilibrium steady state, such as a chemical reaction in an open system [19,20]. It provides a novel equivalent definition for the reaction free energy, or thermodynamic driving force. Based on this relationship, related theories of Ussing [13] and Hodgkin and Huxley [14] for ionic transport across membranes, Hill [2–5,10] for enzyme cycle kinetics, and Crooks [6] for entropy production and work done by microscopically reversible systems, are united in a common framework.

## ACKNOWLEDGMENTS

We thank J.B. Bassingthwaite, A. Cornish-Bowden, and M. E. Fisher for valuable comments on the manuscript. Discussions regarding the Ussing flux ratio with James Sneyd were of great value, as were discussions with Wolfgang Wierchert on labeled isotope exchange.

## Author Contributions

Conceived and designed the experiments: DB HQ. Wrote the paper: DB HQ.

## REFERENCES

- Lewis GN (1925) A new principle of equilibrium. Proc. Natl. Acad. Sci. USA 11: 179–183.
- Hill TL (1966) Studies in irreversible thermodynamics IV. Diagrammatic representation of steady state fluxes for unimolecular systems. J. Theoret. Biol. 10: 442–459.
- Hill TL (1977) Free Energy Transduction in Biology. New York, NY: Academic Press.
- Hill TL (1988) Discrete-time random walks on diagrams (graphs) with cycles. Proc. Natl. Acad. Sci. USA 85: 5345–5349.
- Hill TL (2004) Free Energy Transduction and Biochemical Cycle Kinetics. New York, NY: Dover Publications, Inc.
- Crooks GE (1999) Entropy production fluctuation theorem and the nonequilibrium work relation for free energy differences. Phys. Rev. E. 60: 2721–2726.
- Gallavotti G, Cohen EGD (1995) Dynamic ensembles in nonequilibrium statistical mechanics. Phys. Rev. Lett. 74: 2694–2697.
- Qian H (2001) Nonequilibrium steady-state circulation and heat dissipation functional. Phys. Rev. E. 64: 022101.
- Qian H, Xie, XS (2006) Generalized Haldane equation and fluctuation theorem in the steady state cycle kinetics of single enzymes. Phys. Rev. E. 74: 010902(R).
- Hill TL, Chen YD (1975) Stochastics of cycle completions (fluxes) in biochemical kinetic diagrams. Proc. Natl. Acad. Sci. USA 72: 1291–1295.
- Kohler HH, Vollmerhaus E (1980) The frequency of cyclic processes in biological multistate systems. J Math Biol 9: 275–290.
- Qian C, Qian M, Qian MP (1981) Markov chain as a model of Hill's theory on circulation. Scientia Sinica 24: 1431–1447.
- Ussing HH (1949) The distinction by means of tracers between active transport and diffusion. The transfer of iodide across the isolated frog skin. Acta Physiologica Scandinavica. 19: 43–56.
- Hodgkin AL, Huxley AF (1952) Currents carried by sodium and potassium ions through the membrane of the giant axon of loligo. J. Physiol. 116: 449–472.
- Onsager L (1931) Reciprocal relations in irreversible processes. I. Phys. Rev. 37: 405–426.
- Onsager L (1931) Reciprocal relations in irreversible processes. II. Phys. Rev. 38: 2265–2279.
- Risken H (1996) The Fokker-Planck Equation. Methods of Solution and Applications, second edition. New York: Springer. 474 p.
- Wierchert W, de Graaf AA (1997) Bidirectional reaction steps in metabolic networks: I. Modeling and simulation of carbon isotope labeling experiments. Biotechnol. Bioeng. 55: 101–117.
- Qian H, Beard DA (2005) Thermodynamics of stoichiometric biochemical networks in living systems far from equilibrium. Biophys. Chem. 114: 213–220.
- Qian H, Beard DA, Liang SD (2003) Stoichiometric network theory for nonequilibrium biochemical systems. Eur. J. Biochem. 270: 415–421.
